# Supplementary material for: Assessment of Cucurbita spp. Peel Extracts as Potential Sources of Active Substances for Skin Care and Dermatology
Source: MDPI journal article supplement (doi:10.3390/molecules27217618), 2022-11-06

Supplementary file for the Manuscript:

# Assessment of *Cucurbita* spp. Peel Extracts as Potential Sources of Active Substances for Skin Care and Dermatology

Katarzyna Gawel-Beben, Karolina Czech, Marcelina Strzpek-Gomółka, Marcin Czop, Monika Szczepanik, Anna Lichtarska and Wirginia Kukuła-Koch

**Table S1.** The fingerprints of the analyzed extracts recorded in negative and positive ionization mode by HPLC-ESI-QTOF-MS/MS.

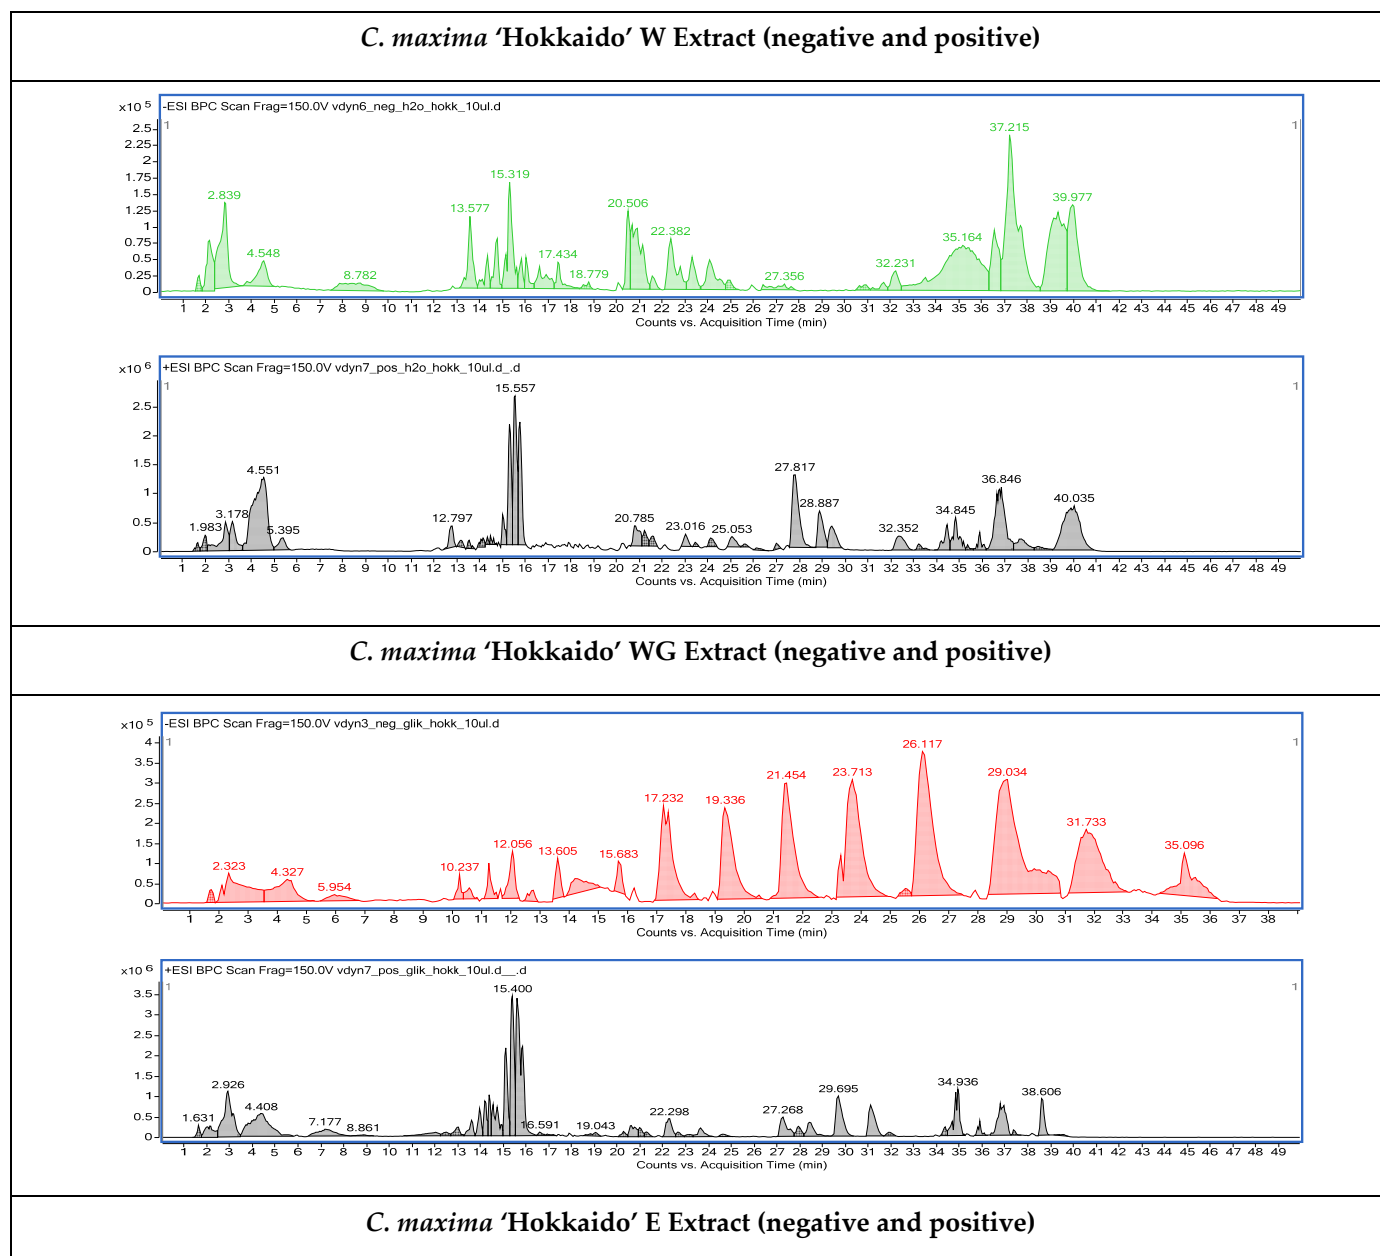

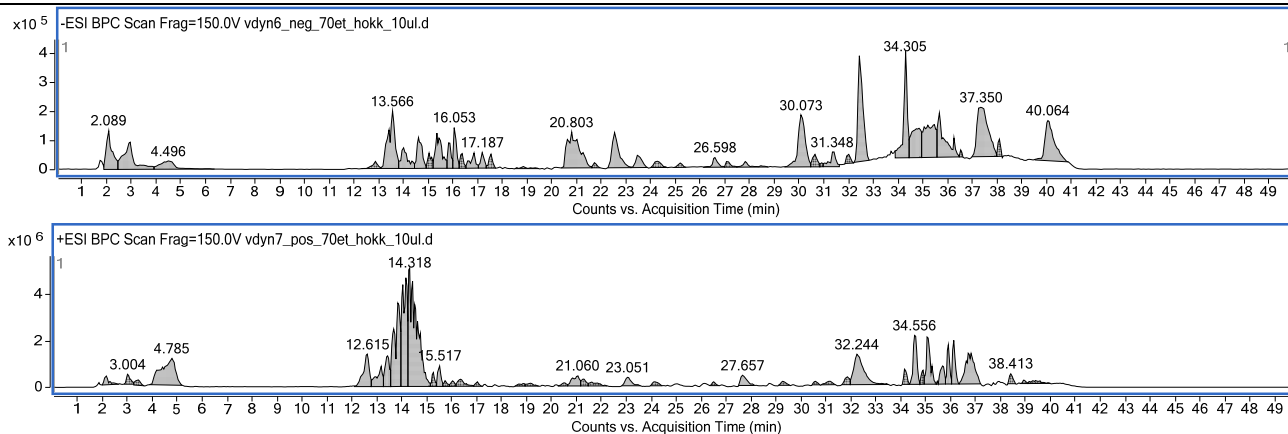

### *C. maxima* 'Halloween' W Extract (negative and positive)

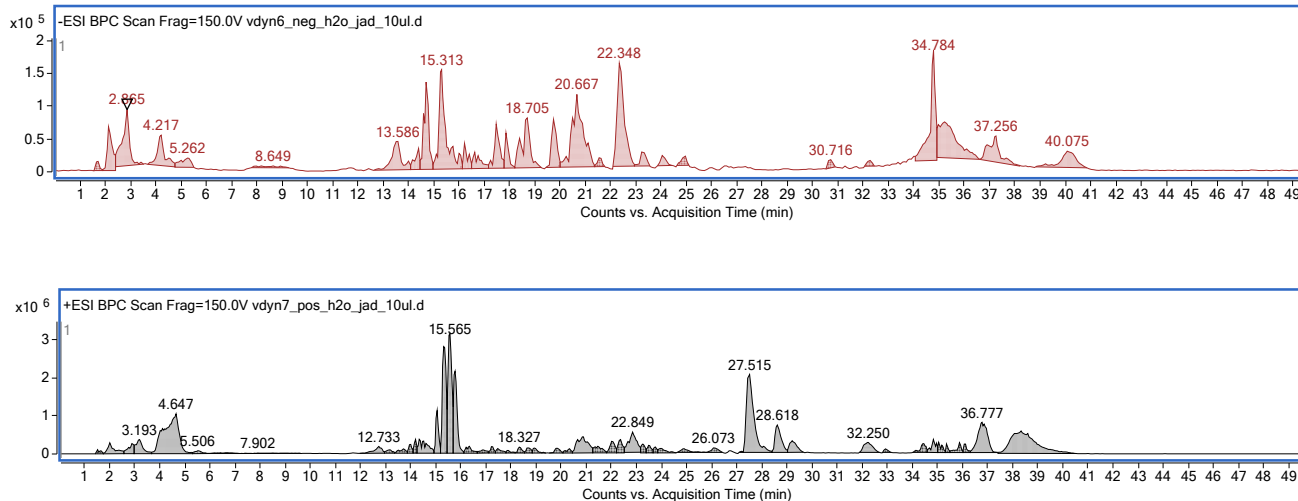

### *C. maxima* 'Halloween' WG Extract (negative and positive)

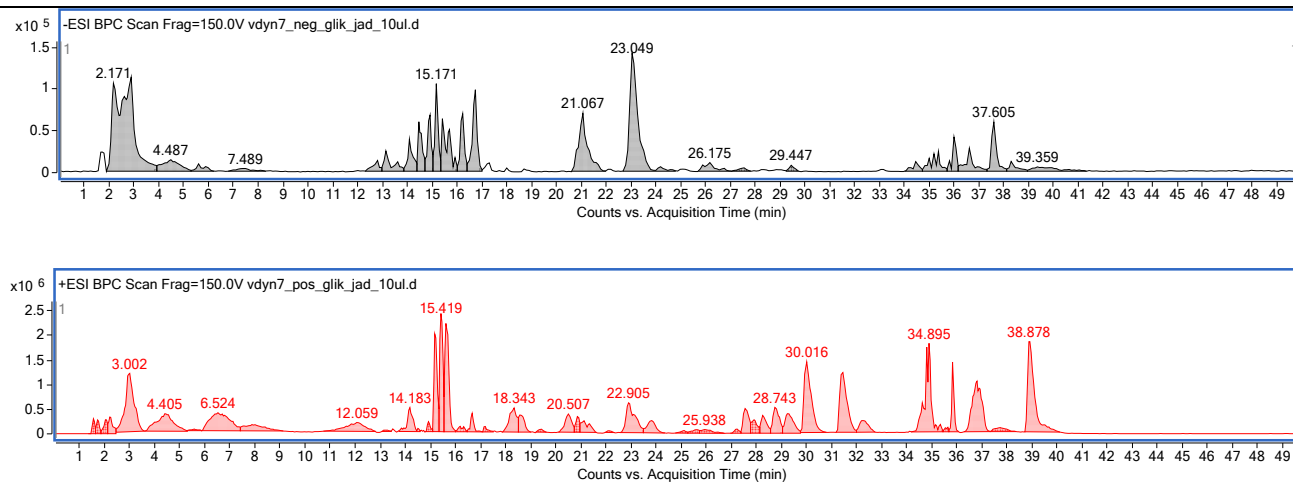

### *C. maxima* 'Halloween' E Extract (negative and positive)

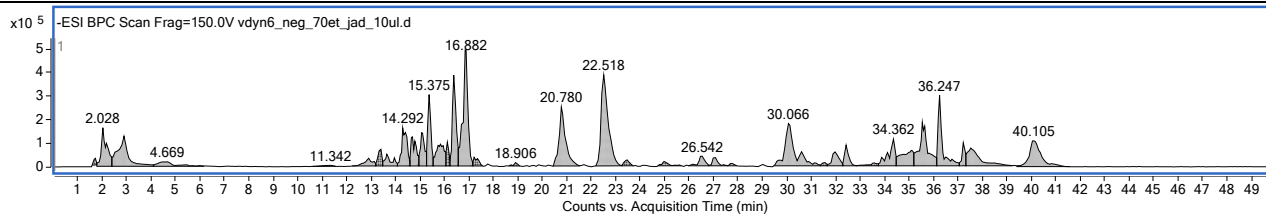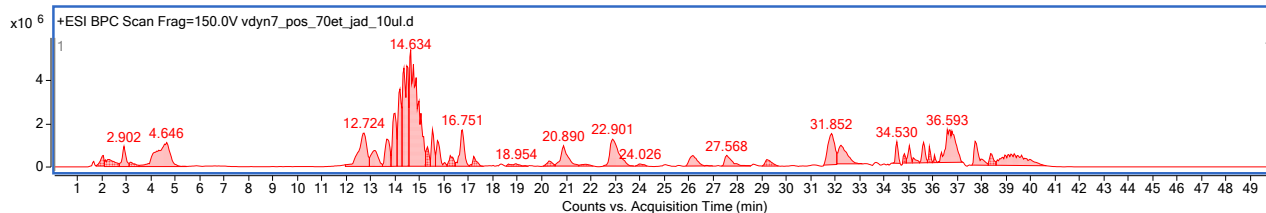

### *C. moschata* 'Muscat' W Extract (negative and positive)

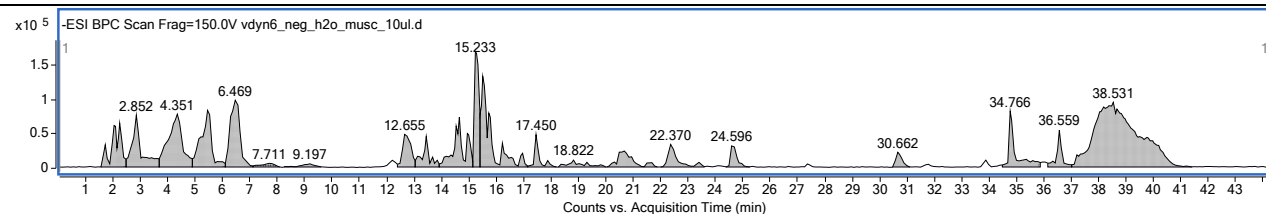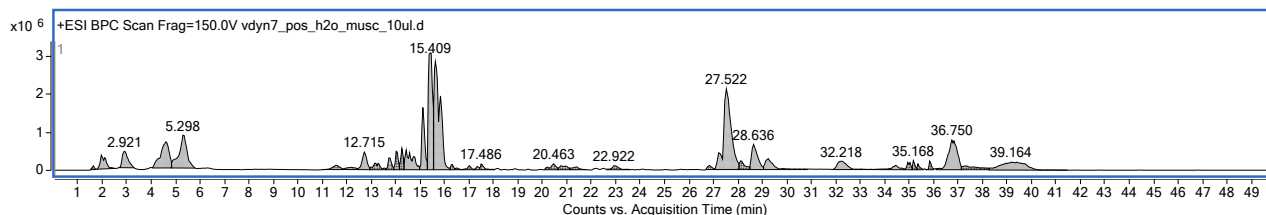

### *C. moschata* 'Muscat' WG Extract (negative and positive)

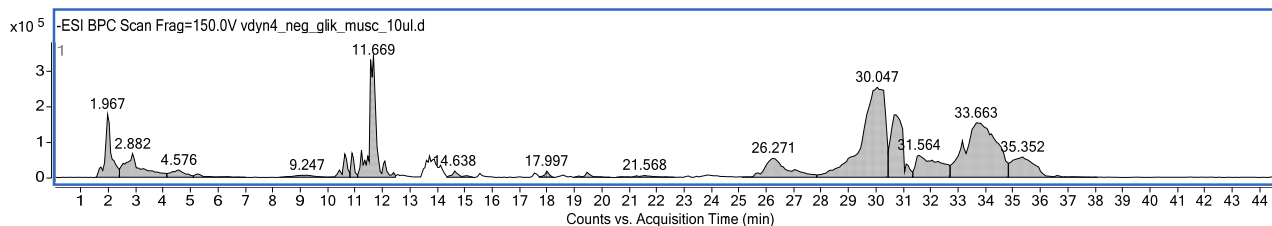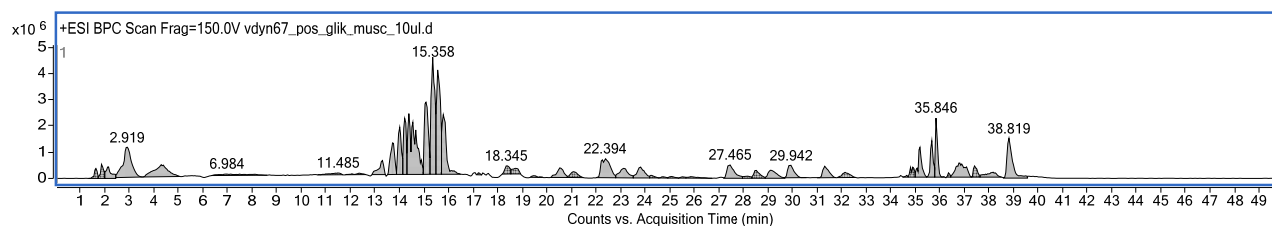

### *C. moschata* 'Muscat' E Extract (negative and positive)

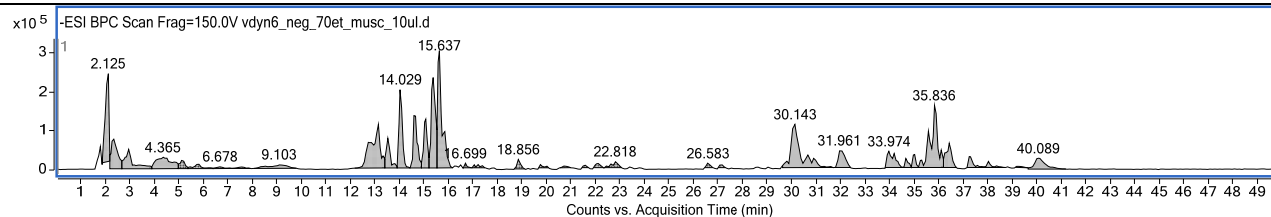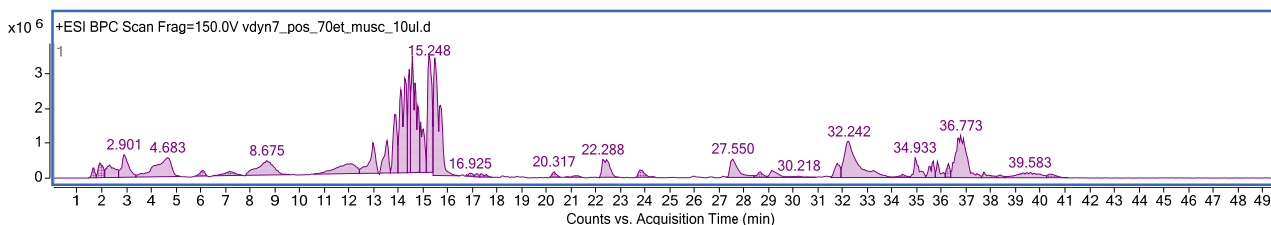

### *C. moschata* 'Nelson' W Extract (negative and positive)

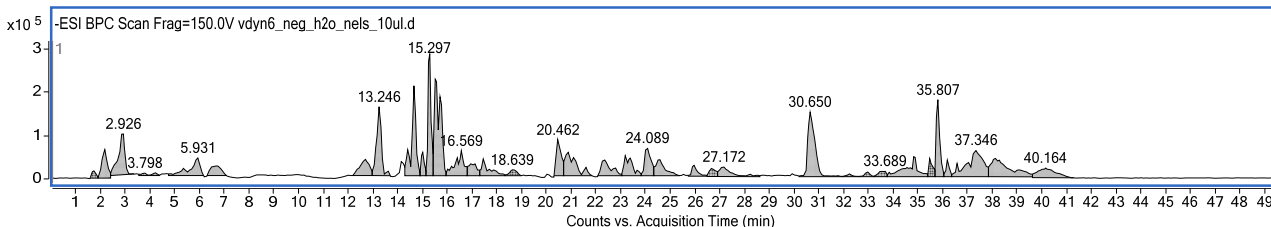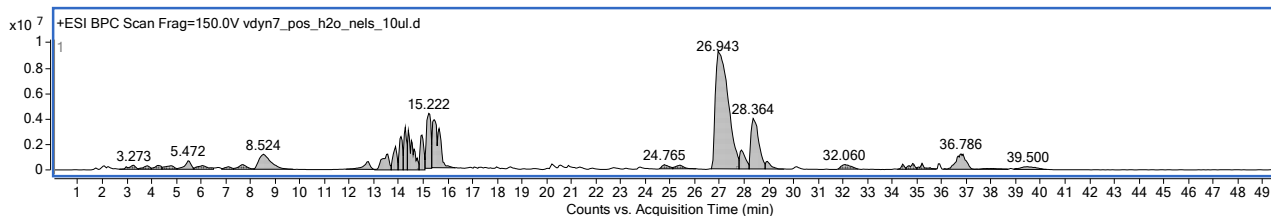

### *C. moschata* 'Nelson' WG Extract (negative and positive)

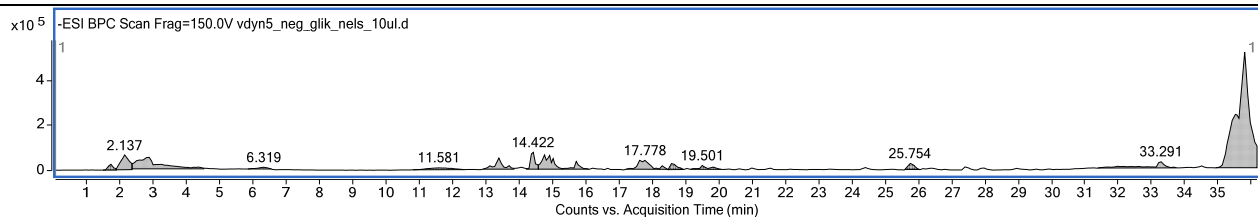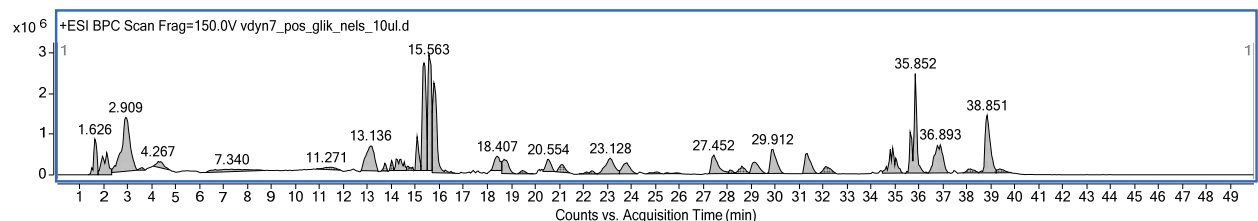

### *C. moschata* 'Nelson' E Extract (negative and positive)

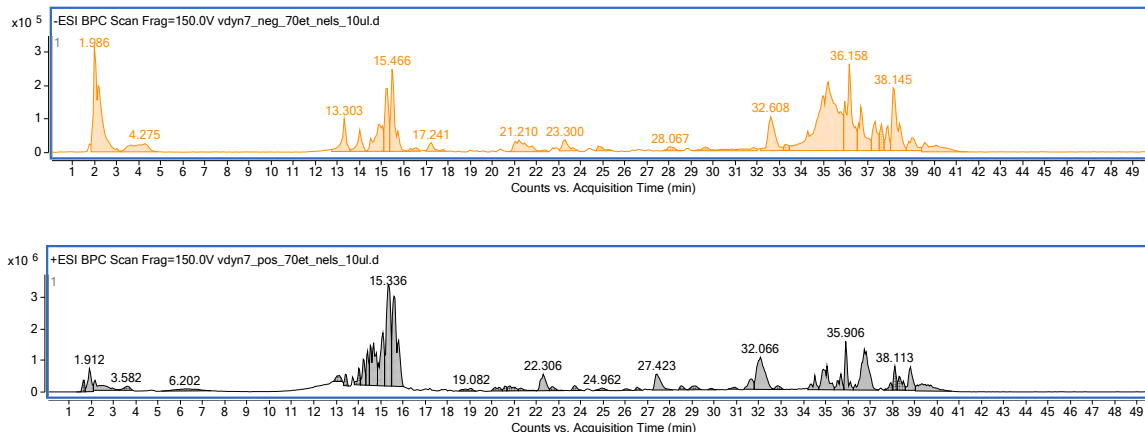

### *C. moschata* 'Butternut' W Extract (negative and positive)

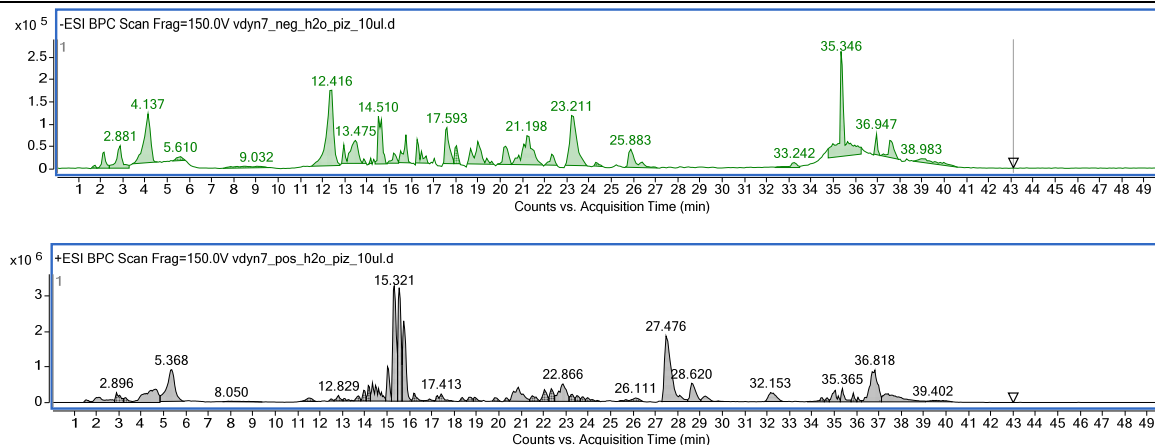

### *C. moschata* 'Butternut' WG Extract (negative and positive)

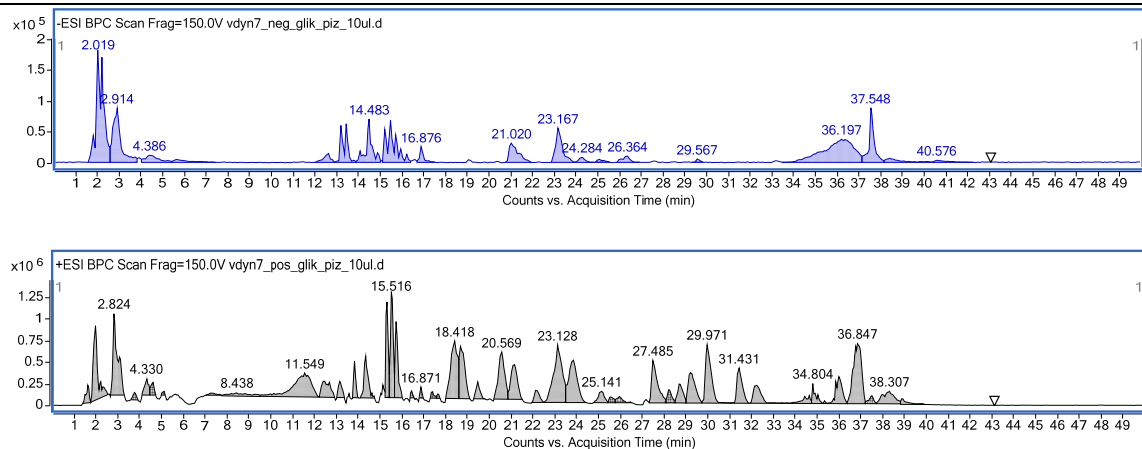

### *C. moschata* 'Butternut' E Extract (negative and positive)

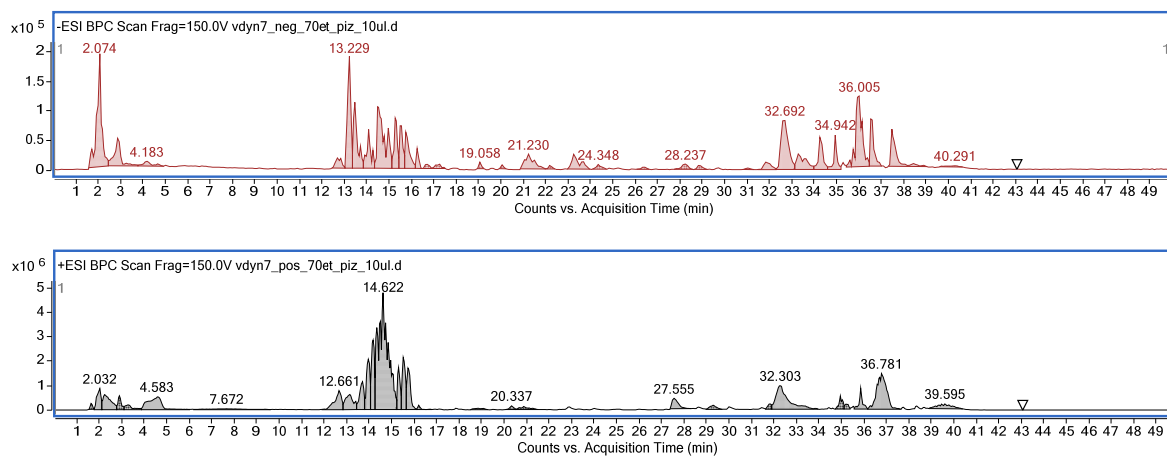

**Table S2.** The selected MS/MS fragmentation spectra of the tentatively identified metabolites.

| proposed compounds | MS/MS spectra                                                                                                                                                                                                                                                    |
|--------------------|------------------------------------------------------------------------------------------------------------------------------------------------------------------------------------------------------------------------------------------------------------------|
| L-phenylalanine    | <p>Top Spectrum: +ESI Product Ion (rt: 4.579 min) Frag=160.0V CID@10.0 (166.0864[z=1] -&gt; **) vdyn7_pos_70et_hokk_10ul.d</p> <p>Bottom Spectrum: +ESI Product Ion (rt: 4.578 min) Frag=170.0V CID@20.0 (166.0864[z=1] -&gt; **) vdyn7_pos_70et_hokk_10ul.d</p> |
| Adenosine          | <p>Top Spectrum: +ESI Product Ion (rt: 2.819 min) Frag=170.0V CID@20.0 (268.1043[z=1] -&gt; **) vdyn7_pos_glik_hokk_10ul.d</p> <p>Bottom Spectrum: +ESI Product Ion (rt: 2.820 min) Frag=160.0V CID@10.0 (268.1043[z=1] -&gt; **) vdyn7_pos_glik_hokk_10ul.d</p> |
| L-tryptophan       | <p>Top Spectrum: +ESI Product Ion (rt: 12.585 min) Frag=160.0V CID@10.0 (205.0975[z=1] -&gt; **) vdyn7_pos_70et_jad_10ul.d</p> <p>Bottom Spectrum: +ESI Product Ion (rt: 12.583 min) Frag=170.0V CID@20.0 (205.0975[z=1] -&gt; **) vdyn7_pos_70et_jad_10ul.d</p> |
| L-valine           | <p>Top Spectrum: +ESI Product Ion (rt: 2.034 min) Frag=160.0V CID@10.0 (118.0862[z=1] -&gt; **) vdyn7_pos_h2o_jad_10ul.d</p> <p>Bottom Spectrum: +ESI Product Ion (rt: 2.029 min) Frag=170.0V CID@20.0 (118.0862[z=1] -&gt; **) vdyn7_pos_h2o_jad_10ul.d</p>     |

## Adenosine

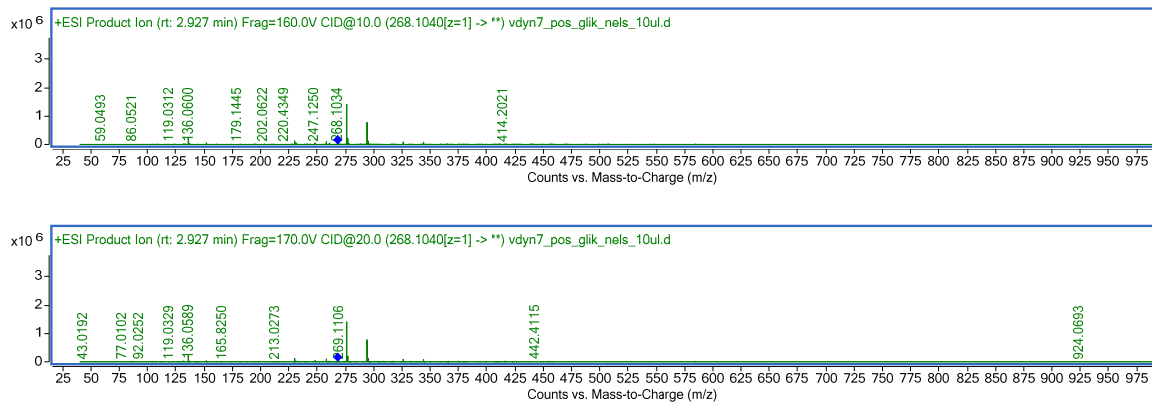

Supplement: s1 [file s1]
